# Supplementary material
Source: Springer Nature journal article supplement (https://www.springermedizin.de/resource/supplementary/12906_2013_1574_MOESM6_ESM.pdf/9522248)

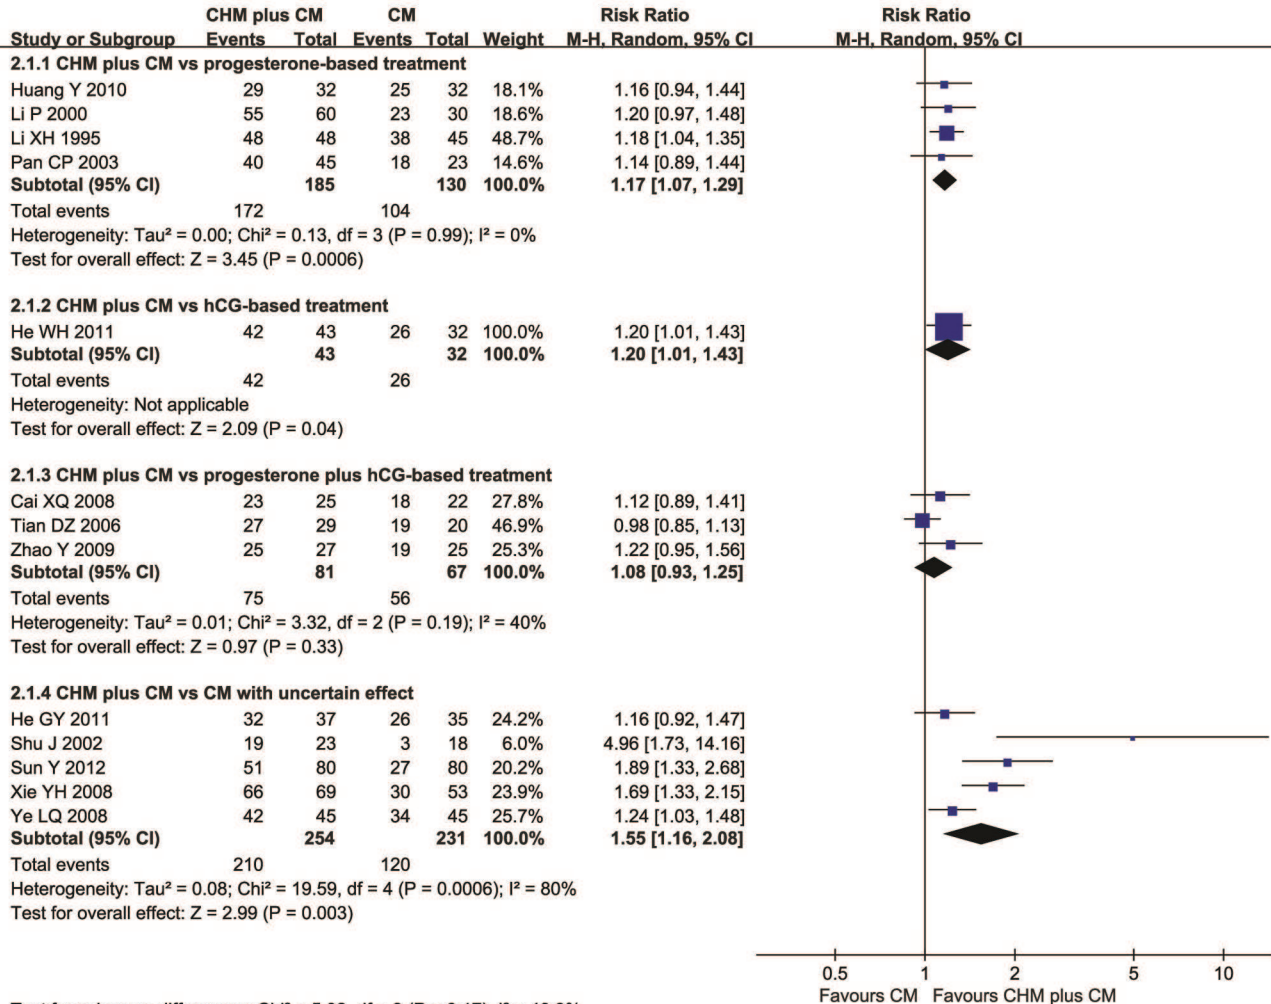

Test for subgroup differences: Chi<sup>2</sup> = 5.02, df = 3 (P = 0.17), I<sup>2</sup> = 40.3%

Supplement: MOESM6 [file 9522248]
